# Supplementary material
Source: PubMed Central journal article supplement (PMC9633794)
Supplement: 41467_2022_34260_MOESM1_ESM.pdf [file 41467_2022_34260_MOESM1_ESM.pdf]

1 **Supplementary Table 1: Patient characteristics Stratified by Trajectory of**  
 2 **Respiratory Failure**

|                                           | HFNC Success         | HFNC Failure         | p     |
|-------------------------------------------|----------------------|----------------------|-------|
| n                                         | 30                   | 20                   |       |
| <b>Baseline Characteristics</b>           |                      |                      |       |
| Race (%)                                  |                      |                      | 0.543 |
| Asian/Mideast Indian                      | 1 ( 3.3)             | 0 ( 0.0)             |       |
| Black/African-American                    | 20 (66.7)            | 13 (65.0)            |       |
| Hispanic                                  | 1 ( 3.3)             | 3 (15.0)             |       |
| More than one Race                        | 1 ( 3.3)             | 0 ( 0.0)             |       |
| Native Hawaiian/Pacific Islander          | 1 ( 3.3)             | 0 ( 0.0)             |       |
| White                                     | 6 (20.0)             | 4 (20.0)             |       |
| Male (%)                                  | 15 (50.0)            | 12 (60.0)            | 0.685 |
| Age (median [IQR])                        | 59.47 [54.31, 67.43] | 67.96 [59.28, 76.10] | 0.113 |
| Body Mass Index (median [IQR])            | 31.05 [27.30, 38.80] | 30.73 [26.95, 33.77] | 0.759 |
| Hypertension (%)                          | 20 (66.7)            | 12 (60.0)            | 0.857 |
| Hyperlipidemia (%)                        | 8 (26.7)             | 9 (45.0)             | 0.3   |
| Diabetes (%)                              | 11 (36.7)            | 9 (45.0)             | 0.768 |
| Cancer (%)                                | 6 (20.0)             | 3 (15.0)             | 0.94  |
| Chronic Kidney Disease (%)                | 1 ( 3.3)             | 4 (20.0)             | 0.149 |
| <b>Clinical Characteristics</b>           |                      |                      |       |
| SOFA Score (median [IQR])                 | 4.00 [4.00, 5.75]    | 9.00 [8.75, 9.00]    | 0.001 |
| APACHE Score (median [IQR])               | 18.00 [13.00, 21.25] | 21.00 [16.75, 29.50] | 0.033 |
| Charlson Comorbidity Index (median [IQR]) | 3.00 [2.00, 4.75]    | 4.00 [2.00, 6.00]    | 0.361 |
| Days from Symptom Onset (median [IQR])    | 5.00 [3.00, 6.75]    | 5.00 [2.00, 8.00]    | 0.905 |
| Admission (%)                             |                      |                      | 0.495 |
| Emergency Department                      | 22 (73.3)            | 12 (60.0)            |       |
| Hospital Medicine                         | 6 (20.0)             | 7 (35.0)             |       |
| Outside Hospital                          | 2 ( 6.7)             | 1 ( 5.0)             |       |
| <b>Medication Administration</b>          |                      |                      |       |
| <b>Antivirals (%)</b>                     |                      |                      |       |
| Steroid Treatment                         | 22 (73.3)            | 18 (90.0)            | 0.279 |
| Remdesivir Treatment                      | 24 (80.0)            | 18 (90.0)            | 0.581 |
| <b>Antibiotics (%)</b>                    |                      |                      |       |
| Betalactams                               | 5 (16.7)             | 4 (20.0)             | 1     |
| Levofloxacin                              | 1 ( 3.3)             | 0 ( 0.0)             | 1     |
| Vancomycin                                | 6 (20.0)             | 6 (30.0)             | 0.636 |
| Metronidazole                             | 1 ( 3.3)             | 1 ( 5.0)             | 1     |
| Macrolides                                | 7 (23.3)             | 7 (35.0)             | 0.563 |
| Doxycycline                               | 4 (13.3)             | 0 ( 0.0)             | 0.242 |
| Trimethoprim-Sulfamethoxazole             | 4 (13.3)             | 2 (10.0)             | 1     |

3 Supplementary Table 1: Univariable analysis comparing patient characteristics and medication  
 4 administration for high flow nasal cannula (HFNC) failure, defined as need for endotracheal  
 5 intubation versus HFNC success, defined as transition to low flow nasal cannula. Categorical  
 6 variables absolute number (percent within group). Categorical variables were compared using a  
 7 two-tailed, chi-squared test, while continuous variables were compared using the Wilcoxon  
 8 rank-sum, two-tailed test (n = 71 independent samples from patients). Unadjusted p-values are  
 9 presented as exact values. Adequate treatment with COVID-19 specific therapy included at  
 10 least three consecutive days of therapy during index hospitalization. Sufficient total dose of  
 11 dexamethasone was 18mg and Remdesivir was 400mg. Only antibiotics received 72 hours prior  
 12 to fecal specimen collection are represented.

13  
14**Supplementary Table 2: Assay 1 Analyzed Compounds – PFBBr Derivatization**

| Common name                | Mass to Charge $m/z$<br>[M-H] <sup>-</sup> or [M+PFBB-H] <sup>-</sup> | Retention time (min) |
|----------------------------|-----------------------------------------------------------------------|----------------------|
| 2-hydroxy-3-methylbutyrate | 117                                                                   | 6.39                 |
| 2-hydroxyhexanoate         | 131                                                                   | 7.03                 |
| 2-hydroxyisocaproate       | 131                                                                   | 6.80                 |
| 2-methylbutyrate           | 101                                                                   | 5.69                 |
| 3-aminoisobutyrate         | 282                                                                   | 8.85                 |
| 4-methylvalerate           | 115                                                                   | 6.31                 |
| 5-aminovalerate            | 476                                                                   | 11.07                |
| acetate                    | 59                                                                    | 4.44                 |
| alanine                    | 268                                                                   | 8.36                 |
| aspartate                  | 492                                                                   | 11.10                |
| benzoate                   | 121                                                                   | 7.53                 |
| butyrate                   | 87                                                                    | 5.48                 |
| catechol                   | 269                                                                   | 9.25                 |
| crotonate                  | 85                                                                    | 5.79                 |
| cysteine                   | 480                                                                   | 11.21                |
| desaminotyrosine           | 345                                                                   | 11.02                |
| dopamine                   | 512                                                                   | 12.81                |
| glutamate                  | 506                                                                   | 11.48                |
| glycine                    | 434                                                                   | 10.05                |
| hexanoate                  | 115                                                                   | 6.49                 |
| histamine                  | 430                                                                   | 11.76                |
| hydrocinnamate             | 149                                                                   | 8.20                 |
| indole-3-acetate           | 174                                                                   | 10.19                |
| indole-3-carboxaldehyde    | 144                                                                   | 9.95                 |
| indole-3-propionate        | 188                                                                   | 10.52                |
| isobutyrate                | 87                                                                    | 5.20                 |
| isoleucine                 | 310                                                                   | 8.97                 |
| isovaleric acid            | 101                                                                   | 5.74                 |
| leucine                    | 310                                                                   | 8.91                 |
| lysine                     | 505                                                                   | 12.01                |
| methionine                 | 328                                                                   | 9.97                 |
| palmitate                  | 255                                                                   | 10.51                |
| p-cresol                   | 107                                                                   | 7.09                 |
| phenol                     | 93                                                                    | 6.61                 |
| phenylacetate              | 135                                                                   | 7.69                 |
| phenylalanine              | 344                                                                   | 10.37                |
| proline                    | 294                                                                   | 9.19                 |
| propionate                 | 73                                                                    | 4.98                 |
| p-toluate                  | 135                                                                   | 8.076                |

|                         |     |       |
|-------------------------|-----|-------|
| serine                  | 464 | 10.69 |
| succinate               | 297 | 9.26  |
| synephrine              | 346 | 11.27 |
| threonine               | 478 | 10.52 |
| trans-indole-3-acrylate | 186 | 11.93 |
| tryptamine              | 500 | 11.69 |
| tryptophan              | 383 | 12.74 |
| tyramine                | 316 | 10.71 |
| tyrosine                | 373 | 11.42 |
| valerate                | 101 | 6.00  |
| valine                  | 296 | 8.67  |

15

16

17

18

19

20

21

22

23

24

25

26

27

28

29

30

31

32

33

34

35

36

37

38

39

40

41

42

43

44

45

46

47

**Supplementary Table 3: Assay 2 Analyzed Compounds – Bile Acids**

| Formal Name                                                                                   | Molecular Formula | Neutral Mass | Common name                      | Mass to Charge $m/z$ [M-H] <sup>-</sup> | Retention Time (+/- 0.15 min within run, +/- 0.40 min across batches) |
|-----------------------------------------------------------------------------------------------|-------------------|--------------|----------------------------------|-----------------------------------------|-----------------------------------------------------------------------|
| 5 $\beta$ -Cholanic acid-3 $\alpha$ , 7 $\alpha$ , 12 $\alpha$ -triol                         | C24H40O5          | 408.2876     | Cholic acid                      | 407.2798                                | 11.75                                                                 |
| 5 $\beta$ -Cholanic acid-3 $\alpha$ , 12 $\alpha$ -diol                                       | C24H40O4          | 392.2927     | Deoxycholic acid                 | 391.2849                                | 15.27                                                                 |
| 5 $\beta$ -Cholanic acid-3 $\alpha$ -ol                                                       | C24H40O3          | 376.2977     | Lithocholic acid                 | 375.2899                                | 18.06                                                                 |
| 5 $\beta$ -Cholanic acid-3 $\alpha$ , 7 $\alpha$ , 12 $\alpha$ -triol N-(carboxymethyl)-amide | C26H43NO6         | 465.309      | Glycocholic acid                 | 464.3012                                | 8.73                                                                  |
| 5 $\beta$ -Cholanic acid-3 $\alpha$ , 7 $\alpha$ , 12 $\alpha$ -triol N-(2-sulphoethyl)-amide | C26H45NO7S        | 515.2917     | Taurocholic acid                 | 514.2839                                | 4.97                                                                  |
| 5 $\beta$ -Cholanic acid-3 $\beta$ , 12 $\alpha$ -diol                                        | C24H40O4          | 392.2927     | Isodeoxycholic acid              | 391.2849                                | 13.24                                                                 |
| 5 $\alpha$ -Cholanic acid-3 $\beta$ -ol                                                       | C24H40O3          | 376.2978     | Alloisolithocholic acid          | 375.2900                                | 16.46                                                                 |
| 3-Oxo-5 $\beta$ -cholanoic acid                                                               | C24H38O3          | 374.2821     | 3-oxolithocholic acid            | 373.2743                                | 18.62                                                                 |
| 5 $\beta$ -Cholanic acid-3 $\alpha$ , 6 $\beta$ , 7 $\alpha$ -triol-N-(2-sulphoethyl)-amide   | C26H45NO7S        | 515.2917     | Tauro- $\alpha$ -muricholic acid | 514.2839                                | 2.35                                                                  |
| 5 $\beta$ -Cholanic acid-3 $\alpha$ , 6 $\beta$ , 7 $\beta$ -triol N-(2-sulphoethyl)-amide    | C26H45NO7S        | 515.2917     | Tauro- $\beta$ -muricholic acid  | 514.2839                                | 2.35                                                                  |
| 5 $\beta$ -Cholanic acid-3, 7, 12-trione-N-(carboxymethyl)-amide                              | C26H37NO6         | 459.2621     | Glycodehydrocholic acid          | 458.2543                                | 1.90                                                                  |
| 5 $\beta$ -Cholanic acid-3 $\alpha$ , 7 $\alpha$ -diol N-(carboxymethyl)-amide                | C26H43NO5         | 449.3141     | Glycochenodeoxycholic acid       | 448.3063                                | 11.97                                                                 |
| 5 $\beta$ -Cholanic acid-3 $\alpha$ , 12 $\alpha$ -diol N-(carboxymethyl)-amide               | C26H43NO5         | 449.3141     | Glycodeoxycholic acid            | 448.3063                                | 12.56                                                                 |
| 5 $\beta$ -Cholanic acid-3 $\alpha$ , 7 $\beta$ -diol N-(carboxymethyl)-amide                 | C26H43NO5         | 449.3141     | Glycoursodeoxycholic acid        | 448.3063                                | 8.26                                                                  |
| 5 $\beta$ -Cholanic acid-3 $\alpha$ -ol N-(carboxymethyl)-amide                               | C26H43NO4         | 433.3192     | Glycolithocholic acid            | 432.3114                                | 15.23                                                                 |

|                                                      |            |          |                             |          |       |
|------------------------------------------------------|------------|----------|-----------------------------|----------|-------|
| 5β-Cholanic acid-3α,6α-diol N-(carboxymethyl)-amide  | C26H43NO5  | 449.3100 | Glycohyodeoxycholic acid    | 448.3022 | 8.70  |
| 5β-Cholanic acid-3α,6α,7β-triol                      | C24H40O5   | 408.2876 | ω-muricholic acid           | 407.2798 | 9.07  |
| 5β-Cholanic acid-3α,6β,7β-triol                      | C24H40O5   | 408.2876 | β-Muricholic acid           | 407.2798 | 10.22 |
| 5β-Cholanic acid-3α,6α,7α-triol                      | C24H40O5   | 408.2876 | γ-Muricholic acid           | 407.2798 | 11.10 |
| 5β-Cholanic acid-3α,6β,7α-triol                      | C24H40O5   | 408.2876 | α-Muricholic acid           | 407.2798 | 9.90  |
| 3α,7α,12α-Trihydroxy-5α-cholan-24-oic acid           | C24H40O5   | 408.2876 | Allocholic acid             | 407.2798 | 11.62 |
| 5β-Cholanic acid-3α,7α-diol                          | C24H40O4   | 392.2927 | Chenodeoxycholic acid       | 391.2849 | 14.87 |
| 5α-Cholanic acid-3α-ol                               | C24H40O3   | 376.2978 | Allolithocholic acid        | 375.2900 | 18.20 |
| 5β-Cholanic acid-3α,7β-diol                          | C24H40O4   | 392.2927 | Ursodeoxycholic acid        | 391.2849 | 11.88 |
| 3α,6α-Dihydroxy-5β-cholan-24-oic acid                | C24H40O4   | 392.2927 | Hyodeoxycholic acid         | 391.2849 | 12.23 |
| 5β-Cholanic acid-7α,12α-diol                         | C24H40O4   | 392.2927 | 3-Deoxycholic acid          | 391.2849 | 17.35 |
| 5β-Cholanic acid-3β-ol                               | C24H40O3   | 376.2977 | Isolithocholic acid         | 375.2899 | 17.01 |
| 5β-Cholanic acid-3α,7α-diol-12-one                   | C24H38O5   | 406.2719 | 12-Oxocholedeoxycholic acid | 405.2641 | 8.61  |
| 5β-Cholanic acid-3α,12α-diol-7-one                   | C24H38O5   | 406.2719 | 7-Oxodeoxycholic acid       | 405.2641 | 8.96  |
| 5β-Cholanic acid-7α,12α-diol-3-one                   | C24H38O5   | 406.2719 | 3-Oxocholeic acid           | 405.2641 | 10.70 |
| 5β-Cholanic acid-12α-ol-3-one                        | C24H38O4   | 390.277  | 3-Oxodeoxycholic acid       | 389.2692 | 14.76 |
| 5β-Cholanic acid-7α-ol-3-one                         | C24H38O4   | 390.277  | 3-Oxocholedeoxycholic acid  | 389.2692 | 14.76 |
| 5β-Cholanic acid-3α-ol-7-one                         | C24H38O4   | 390.277  | 7-Oxolithocholic acid       | 389.2692 | 12.37 |
| 5β-Cholanic acid-3α-ol-6-one                         | C24H38O4   | 390.277  | 6-Oxolithocholic acid       | 389.2692 | 12.37 |
| 5β-Cholanic acid-3α-ol-12-one                        | C24H38O4   | 390.277  | 12-Oxolithocholic acid      | 389.2692 | 12.67 |
| 5β-Cholanic acid-3α,12α-diol N-(2-sulphoethyl)-amide | C26H45NO6S | 499.2968 | Taurodeoxycholic acid       | 498.289  | 9.35  |
| 5β-Cholanic acid-3α-ol N-(2-sulphoethyl)-amide       | C26H45NO5S | 483.3018 | Tauroolithocholic acid      | 482.294  | 11.80 |
| 5β-Cholanic acid-3α,7α-diol N-(2-sulphoethyl)-amide  | C26H45NO6S | 499.2968 | Taurocholedeoxycholic acid  | 498.289  | 8.70  |

|                                                                                      |              |          |                                       |          |       |
|--------------------------------------------------------------------------------------|--------------|----------|---------------------------------------|----------|-------|
| 3 $\alpha$ ,7 $\beta$ -Dihydroxy-5 $\beta$ -cholan-24-oic acid N-(2-sulfoethyl)amide | C26H45NO6S   | 499.2968 | Tauroursodeoxycholic acid             | 498.289  | 4.30  |
| 5 $\beta$ -Cholanic acid-3 $\alpha$ ,6 $\alpha$ -diol-N-(2-sulphoethyl)-amide        | C26H45NO6S   | 499.2968 | Taurohyodeoxycholic acid              | 498.289  | 4.60  |
| 5 $\beta$ -Cholanic acid-3 $\alpha$ -ol-7,12-dione                                   | C24H36O5     | 404.2563 | 3-Hydroxy-7,12-diketolithocholic acid | 403.2485 | 5.00  |
| 3 $\alpha$ ,7 $\beta$ ,12 $\alpha$ -Trihydroxy-5 $\beta$ -cholan-24-oic acid         | C24H40O5     | 408.2876 | Ursocholic acid                       | 407.2798 | 6.75  |
| D4-Cholic acid                                                                       | C24H36D4O5   | 412.3126 | D4-Cholic acid                        | 411.3048 | 11.76 |
| D4-Deoxycholic acid                                                                  | C24H36D4O4   | 396.3177 | D4-Deoxycholic acid                   | 395.3099 | 15.20 |
| D4-Glycocholic acid                                                                  | C26H39D4NO6  | 469.3341 | D4-Glycocholic acid                   | 468.3263 | 8.73  |
| D4-Glycodeoxycholic acid                                                             | C26H39D4NO5  | 453.3392 | D4-Glycodeoxycholic acid              | 452.3314 | 12.50 |
| D4-Lithocholic acid                                                                  | C24H36D4O3   | 380.3228 | D4-Litchocholic acid                  | 379.3150 | 18.00 |
| D4-Taurocholic acid                                                                  | C26H41D4NO7S | 519.3167 | D4-Taurocholic acid                   | 518.3089 | 5.01  |
| D4-Taurodeoxycholic acid                                                             | C26H41D4NO6S | 503.3218 | D4-Taurodeoxycholic acid              | 502.3140 | 9.40  |
| D5-Alpha-muricholic acid                                                             | C24H35D5O5   | 413.3189 | D5-Alpha-muricholic acid              | 412.3111 | 9.85  |
| D4-Taurochenodeoxycholic acid                                                        | C26H41D4NO6S | 503.3218 | D4-Taurochenodeoxycholic acid         | 502.3140 | 8.70  |

51 **Supplementary Figure 1: Consort Diagram**

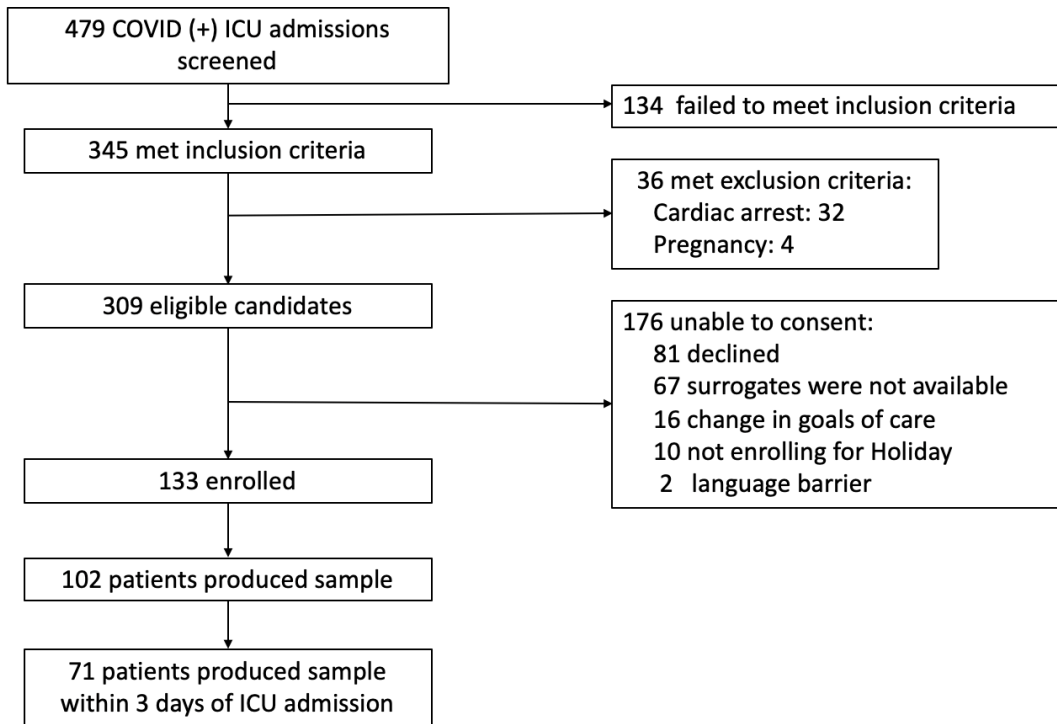

52

53 Supplementary Figure 1 Legend: Consort diagram for study enrollment.

54

55

56

57

58

59

60

61

62

63

64

65

66

67

68

69

70

71

72

73

74

75  
76

## Supplementary Figure 2

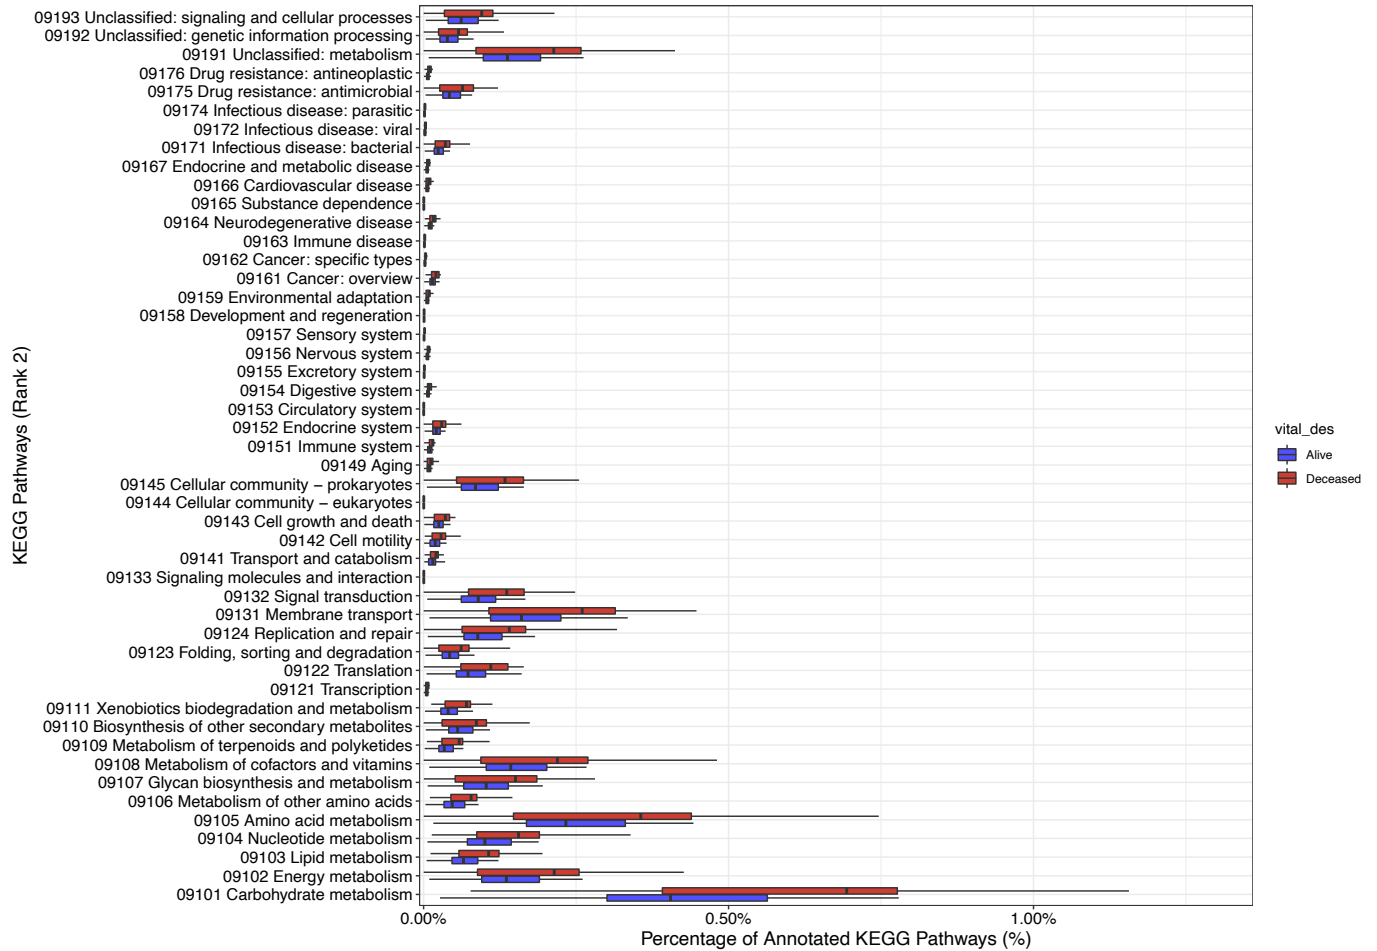

77  
78  
79  
80  
81  
82  
83  
84  
85  
86  
87  
88  
89  
90  
91  
92  
93  
94  
95  
96

Supplementary Figure 2 Legend: KEGG pathway analysis stratified by survival outcome (blue box: alive and red box: deceased). KEGG pathways (Rank 2) were calculated as a total percent of all pathways encoded and plotted as boxplots with values per each rank 2 category. After performing a two-tailed, Wilcoxon rank-sum test, there were no statistical differences across all KEGG pathways shown (n = 71 independent samples from patients). Boxes show interquartile ranges (IQR) where the center black line represents the median and the whiskers (vertical black lines) extend to 1.5 x IQR or to the minimum and maximum value, whichever is closest to the median



97 **Supplementary Figure 3**  
 98

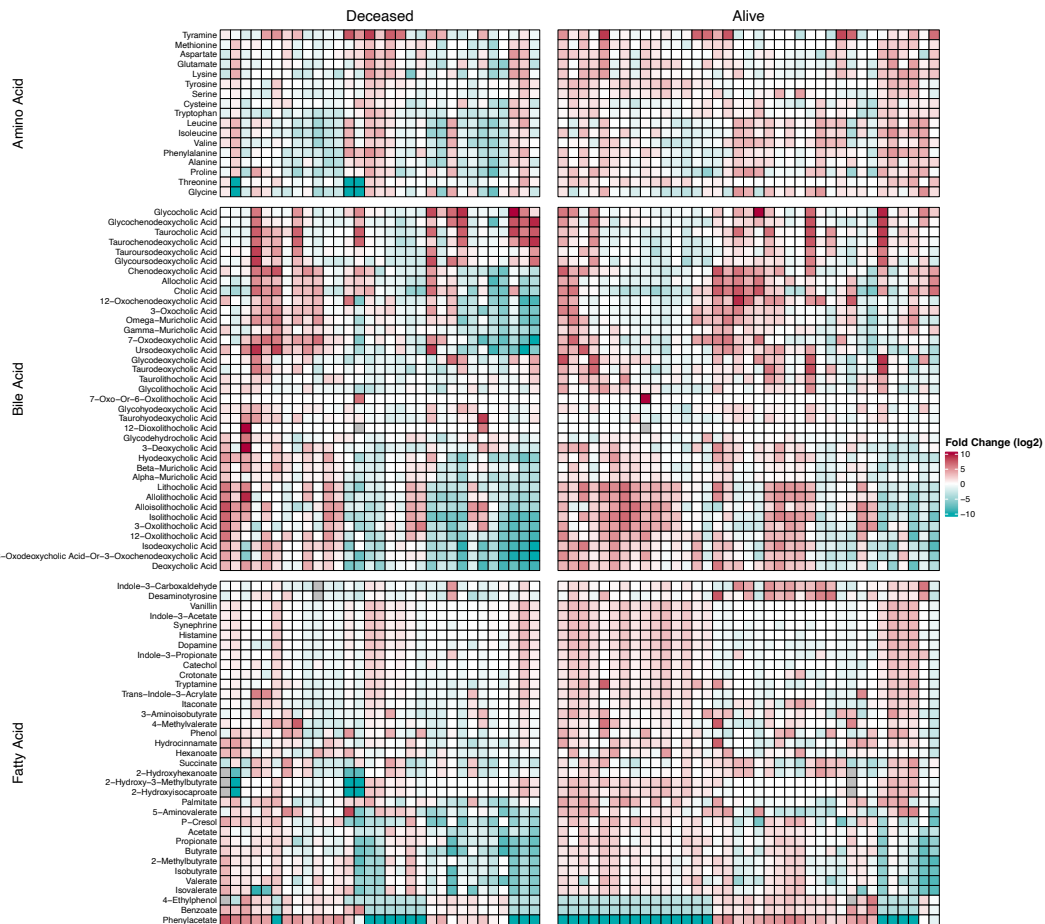

99  
 100  
 101  
 102 Supplementary Figure 3 Legend: Heatmap of 89 relatively quantified fecal metabolites. Dark  
 103 cyan colors correlate to low log<sub>2</sub> fold-change values relative to the median value per compound,  
 104 while dark red colors correlate to high log<sub>2</sub> fold-change values relative to the median value per  
 105 compound. Missing values are shown in gray. n = 71 independent samples from patients.

106  
 107  
 108  
 109  
 110  
 111  
 112  
 113  
 114  
 115

## 116 Supplementary Methods:

### 117 **Supplementary Metabolomic Methods (MetaboLights study MTBLS5288)**

118

#### 119 **Stool Collection and Extraction for All Metabolomic Assays**

120 **Collection:** Freshly obtained stool samples were collected from patients in a sterile specimen vessel  
121 (University of Chicago, IRB 20-1102). Samples were immediately placed on ice or at 4 °C and then  
122 immediately aliquoted for downstream analyses. **Stool Splitting and Storage:** Stool samples were then  
123 split into aliquots for downstream analyses (metabolomics, genomics). For each analysis, stool was split  
124 into a separate 1.5 ml Eppendorf tube. Mass requirements for analyses were: metabolomics, ~100 mg;  
125 genomics, ~250 mg (16S and shotgun sequencing). Minimum requirements for metabolomic analyses in  
126 this study was 20 mg/assay. The bulk stool sample and split Eppendorf tubes were kept on ice and the  
127 aliquots were immediately stored at -80 °C. **Extraction:** Extraction solvent (80% methanol spiked with  
128 internal standards and stored at -80 °C) was added to pre-weighed fecal samples at a ratio of 100 mg of  
129 material/ml of extraction solvent in beadruptor tubes (Fisherbrand; 15-340-154). Samples were  
130 homogenized at 4 °C on a Bead Mill 24 Homogenizer (Fisher; 15-340-163), set at 1.6 m/s with 6 x 30s  
131 cycles, 5 s off per cycle. Samples were then centrifuged at -10 °C, 20,000 x g for 15 min and the  
132 supernatant was used for subsequent metabolomic analysis

133

#### 134 **Assay 1 (CI-GC-MS): Pentafluorobenzyl bromide (PFBBr) derivatization for targeted**

#### 135 **metabolomics with (-)CI-GCMS (quantitative and normalized relative abundance)**

136 **Preparation for Pentafluorobenzyl Bromide (PFBBr) Derivatization:** Samples were derivatized as  
137 previously described with the following modifications [1]. Briefly, the metabolite extract (100 µl) was  
138 added to 100 µl of 100 mM borate buffer (pH 10) (Thermo Fisher, 28341), 400 µl of 100 mM  
139 pentafluorobenzyl bromide (Millipore Sigma; 90257) in acetonitrile (Fisher; A955-4), and 400 µl of n-  
140 hexane (Acros Organics; 160780010) in a capped mass spectrometer autosampler vial (Microliter; 09-  
141 1200). Samples were heated in a thermomixer C (Eppendorf) to 65 °C for 1 h while shaking at 1300 rpm.  
142 After cooling to RT, samples were centrifuged at 4 °C, 2000 x g for 5 min, allowing phase separation.  
143 The hexanes phase (100 µl) (top layer) was transferred to an autosampler vial containing a glass insert  
144 and the vial was sealed. Another 100 µl of the hexanes phase was diluted with 900 µl of n-hexane in an  
145 autosampler vial. **Chromatography:** Concentrated and dilute samples were analyzed using a GC-MS  
146 (Agilent 8890/7890B GC system, Agilent 5977B MSD) with a 1 µl split injection (1:10 split ratio). Oven  
147 ramp parameters: 1 min hold at 60 °C, 25 °C/min up to 300 °C with a 2.5 min hold at 300 °C. Inlet  
148 temperature was 280 °C and transfer line was 310 °C. Using a HP-5ms ultra inert column (30 m x 0.25  
149 mm, 0.25 µm; Agilent Technologies 19091S-433UI), methane as the reagent gas. **Instrument Settings:**  
150 The instrument was in Scan acquisition mode (m/z 50-600) with a solvent delay of 4.2 with Normal  
151 Scanning and operating in negative chemical ionization mode with methane used as the reagent gas  
152 (99.999% pure). **Data Transformation:** A 10-point calibration curve was prepared with acetate (100  
153 mM), propionate (25 mM), butyrate (12.5 mM), and succinate (50 mM), with 9 subsequent 2x serial  
154 dilutions. Data analysis was performed using **MassHunter Quantitative Analysis software (version**  
155 **B.10, Agilent Technologies)** and confirmed by comparison to retention time, nominal mass, and  
156 fragmentation patterns of authentic standards (**Supplementary Table 2**). Normalized peak areas were  
157 calculated by dividing raw peak areas of targeted analytes by raw peak areas of spiked internal standards.  
158 Internal standards used for quantitation (Cambridge Isotope Laboratories, D3-acetate DLM-3126-25; D5-  
159 propionate DLM-1601-1; D7-butyrate DLM-7616-PK; D9-valerate DLM-572-5 DLM-572-5; D8-valine  
160 DLM-488-0.25; D6-succinate DLM-831-PK; D6-phenol DLM-370-PK). Relative abundance data were  
161 normalized to the average of D8-valine/D6-valerate or D7-proline/D6-phenol. **Metabolite Identification:**  
162 Authentic standards were purchased for all targeted compounds and prepared at 1 mg/ml in methanol. All  
163 metabolite identifications are level 1 according to the CAWG standard initiative [2].

164

165

166 **Assay 2 (UPLC-QTOF-MS): Bile acid targeted metabolomics (-)ESI-LC-QTOF (quantitative and**  
167 **normalized relative abundance)**

168 **Extraction:** For bile acid analysis, 75  $\mu$ l of supernatant was added to pre-labeled microcentrifuge tubes  
169 and dried down completely under a nitrogen stream at 30 l/min (top) 1 l/min (bottom) at 30 °C (Biotage  
170 SPE Dry 96 Dual; 3579M). Samples were reconstituted in 50:50 water:methanol (750  $\mu$ l) and added to a  
171 thermomixer C (Eppendorf) to resuspend analytes at 4 °C, 1000 rpm for 15 min with an infinite hold at 4  
172 °C. Samples were then centrifuged at 4 °C, 20,000 x g for 15 min to remove insoluble debris, and the  
173 supernatant (700  $\mu$ l) was transferred to fresh, pre-labeled mass spectrometry autosampler vials  
174 (Microliter; 09-1200) for LCMS analysis. **Chromatography:** Samples were analyzed using a liquid  
175 chromatography system (Agilent 1290 Infinity II). Each sample (5  $\mu$ l) was injected onto an XBridge BEH  
176 C18 Column (3.5  $\mu$ m, 2.1 x 100 mm; Waters Corporation, PN) fitted with an XBridge BEH C18 guard  
177 (Waters Corporation, PN) at 45 °C. Elution started with 72% A (Water, 0.1% formic acid) and 28% B  
178 (Acetone, 0.1% formic acid) with a flow rate of 0.4 ml/min for 1 min and linearly increased to 33% B  
179 over 5 min, and then linearly increased to 65% B over 14 min. The flow rate was then increased to 0.6  
180 ml/min and B was increased to 98% over 0.5 min, and these conditions were held constant for 3.5 min.  
181 Finally, re-equilibration at a flow rate of 0.4 ml/min of 28% B was performed for 3 min. **Instrument**  
182 **Settings:** Samples were analyzed using a quadrupole time-of-flight (QTOF) mass spectrometer (Agilent  
183 6546) (coupled with Agilent 1290 Infinity II) in negative mode, equipped with an Agilent Jet Stream  
184 Electrospray Ionization source. The electrospray ionization conditions were set with the capillary voltage  
185 at 3.5 kV, nozzle voltage at 2 kV, gas temperature 325 °C, gas flow 10 l/min, nebulizer 20 psig, sheath  
186 gas temperature 275 °C, and sheath gas flow 11 l/min. Data was acquired at a scan rate of 2 spectra/s,  
187 MS1 mode, and detection window set to 100-1700 m/z with continuous infusion of a reference mass  
188 (Agilent ESI TOF Biopolymer Analysis Reference Mix) for mass calibration. **Data Transformation:** A  
189 10-point calibration curve was used for quantitation of 8 bile acids (cholic acid, glycocholic acid,  
190 taurocholic acid, deoxycholic acid, lithocholic acid, isodeoxycholic acid, alloisolithocholic acid and 3-  
191 oxolithocholic acid). Bile acid data analysis was performed using **MassHunter Profinder Analysis**  
192 **software (version B.10, Agilent Technologies)**. Identification of endogenous compounds was confirmed  
193 by comparison of m/z and retention time to authentic standards (**Supplementary Table 3**). Normalized  
194 peak areas were calculated by dividing raw peak areas of targeted analytes by averaged raw peak areas of  
195 spiked internal standards. **Metabolite Identification:** Authentic bile acid standards were prepared at 1  
196 mg/ml in methanol and analyzed as pure standards as well as spiked into a pooled biological sample from  
197 each batch. (**Avanti Polar Lipids and Sigma Aldrich**). All metabolite identifications are level 1  
198 according to the CAWG standard initiative [2]. Additionally, ions with epimer/isomers were purchased  
199 and analyzed individually and as mixtures to ensure accurate identification in biological samples.  
200 Compounds that were not resolvable with clear overlapping epimer/isomers were removed from analyses  
201 (if applicable). All identified compounds are reported at < 5 ppm difference between the known m/z and  
202 the detected m/z with a mass resolution of 50,000.

203  
204  
205 **Assay 3 (UPLC-TQ-MS): Desaminotyrosine (DAT) and indole-3-carboxaldehyde (I3C) targeted**  
206 **quantitation by (-)ESI-LC-QQQ (quantitative)**

207 **Extraction:** For analysis of desaminotyrosine and indole-3-carboxyaldehyde, 200  $\mu$ l of supernatant was  
208 added to pre-labeled microcentrifuge tubes and dried down completely under a nitrogen stream at 30  
209 l/min (top) 1 l/min (bottom) at 30 °C (Biotage SPE Dry 96 Dual; 3579M). Samples were reconstituted in  
210 50:50 water:methanol (50  $\mu$ l) and added to a thermomixer C (Eppendorf) to resuspend analytes at 4 °C,  
211 1000 rpm for 15 min with an infinite hold at 4 °C. Samples were then centrifuged at 4 °C, 20,000 x g for  
212 15 min to remove insoluble debris, and supernatant (40  $\mu$ l) from each sample was transferred to a 96 well  
213 plate (Agilent; 5065-4402) for LCMS analysis. **Chromatography:** Samples were analyzed on an Agilent  
214 1290 infinity II liquid chromatography system. Each sample (2  $\mu$ l) was injected into an Acquity UPLC  
215 HSS PFP column, 1.8  $\mu$ m, 2.1 x 100 mm (Waters; 186005967) equipped with an Acquity UPLC HSS  
216 PFP VanGuard Pre-column, 100 Å, 1.8  $\mu$ m, 2.1 mm x 5 mm (Waters; 186005974) at 45 °C. Mobile phase

217 A was 0.1% formic acid in water and mobile phase B was 0.1% formic acid in 95:5 acetonitrile:water.  
218 The flow rate was set to 0.5 ml/min starting at 0% B held constant for 3 min, then linearly increased to  
219 50% over 5 min, then linearly increased to 95% B over 1 min, and held at 100% B for the next 3 min.  
220 Mobile phase B was then brought back down to 0% over 0.5 min and held at 0% for re-equilibration for  
221 2.5 min. **Instrument Settings:** Samples were analyzed using an Agilent 6470 triple quadrupole mass  
222 spectrometer (coupled with Agilent 1290 Infinity II) in negative mode, equipped with an Agilent Jet  
223 Stream Electrospray Ionization source. The electrospray conditions were set with capillary voltage at 4  
224 kV and nozzle voltage at 500 V, and Dynamic MRM was used with a cycle time of 500 ms. Sheath gas  
225 flow and temperature were 11 l/min and 275 °C, respectively. Transitions were monitored in negative  
226 mode, and the transitions for desaminotyrosine and indole-3-carboxaldehyde were 165.17 m/z to m/z 93.1  
227 and 144.16 m/z to 116 m/z, respectively. DAT acquisition: Fragmentor (70), Collision Energy (32), Cell  
228 Accelerator Voltage (5). I3C acquisition: Fragmentor (90), Collision Energy (16), Cell Accelerator  
229 Voltage (5). **Data Transformation:** An 11-point calibration curve (ranging from 0.98 nM to 1 mM) was  
230 prepared using desaminotyrosine and indole-3-carboxaldehyde standards. Data analysis was performed  
231 using **MassHunter Quant software (version B.10, Agilent Technologies)** and confirmed by comparison  
232 of retention time, nominal mass, and qualifying fragment ion to authentic standards. Normalized peak  
233 areas were calculated by dividing raw peak areas of targeted analytes by averaged raw peak areas of  
234 spiked internal standards. **Metabolite Identification:** Stock solutions of desaminotyrosine and indole-3-  
235 carboxaldehyde (1 mg/ml in 50:50 water:methanol) were prepared using standards purchased from **Sigma**  
236 **Aldrich**. All metabolite identifications are level 1 according to the CAWG standard initiative [2].

## 237 238 References

- 239  
240 1. Haak BW, Littmann ER, Chaubard JL, Pickard AJ, Fontana E, Adhi F, Gyaltshen Y, Ling L, Morjaria  
241 SM, Peled JU, van den Brink MR, Geyer AI, Cross JR, Pamer EG, Taur Y. Impact of gut colonization with  
242 butyrate-producing microbiota on respiratory viral infection following allo-HCT. *Blood*. 2018 Jun 28;  
243 131(26):2978-2986. doi: 10.1182/blood-2018-01-828996. Epub 2018 Apr 19. PMID: 29674425; PMCID:  
244 PMC602463
- 245  
246 2. Sumner LW, Amberg A, Barrett D, Beale MH, Beger R, Daykin CA, Fan TW, Fiehn O, Goodacre R,  
247 Griffin JL, Hankemeier T, Hardy N, Harnly J, Higashi R, Kopka J, Lane AN, Lindon JC, Marriott P,  
248 Nicholls AW, Reilly MD, Thaden JJ, Viant MR. Proposed minimum reporting standards for chemical  
249 analysis Chemical Analysis Working Group (CAWG) Metabolomics Standards Initiative (MSI).  
250 *Metabolomics*. 2007 Sep;3(3):211-221. doi: 10.1007/s11306-007-0082-2. PMID: 24039616; PMCID:  
251 PMC3772505.

252

253

254
